# Supplementary material for: Effects of Surfactant Warm‐Mix Additives on the Rheological Properties of High‐Viscosity Asphalt
Source: Hindawi journal article supplement (doi:10.1155/2020/6506938), 2020-01-01
Supplement: f1 [file 6506938.f1.docx]

**Effects of Surfactant Warm-mix Additive on the Rheological Properties of High-Viscosity Asphalt**

Jingtao Shi1,2, Weiyu Fan1*, Yi Lin1, Pinhui Zhao1*, Jian Ouyang3*

1 State Key Laboratory of Heavy Oil Processing, College of Chemical Engineering, China University of Petroleum (East China), Qingdao 266580, P. R. China

2 Petrochina Fuel Oil Company Limited Research Institute, Beijing, P. R. China

3 School of Transportation and Logistics, Dalian University of Technology, Dalian 116024, China

**1. Preparation of high viscosity modifier SJH**

C9 petroleum resin particles, granular SBS modifier, powder solid rosin, EVA particles and talc powder were added to the pulverizer and premixed to obtain mixed solid powder. The mixed solid powder is injected into the preheated twin-screw extruder, the extruded strip mixture is cooled into cold water, and the granular high viscosity asphalt modifier is formed by cutting and screening of the granulator.
